# Supplementary material for: Adipsin, MIP-1b, and IL-8 as CSF Biomarker Panels for ALS Diagnosis
Source: Hindawi journal article supplement (doi:10.1155/2018/3023826), 2018-10-10
Supplement: f1 [file 3023826.f1.pdf]

| Grupo | IL-1b (39) | IL-2 (38) | IL-4 (52) | IL-5 (33) | IL-6 (19) | IL-7 (74) | IL-8 (54) | IL-10 (56) | (p70) (75) | IL-13 (51) | IL-17 (76) | CSF (57) | CSF (34) | IFN-g (21) | CAF (53) | IP-1b (18) | NF-a (36) | Adipsin  | diponectin |
|-------|------------|-----------|-----------|-----------|-----------|-----------|-----------|------------|------------|------------|------------|----------|----------|------------|----------|------------|-----------|----------|------------|
| 1     | 0.19       | 0.99      | 0.31      | 0.32      | 1.78      | 0.0001    | 11.18     | 1.54       | 0.0001     | 1.12       | 4.99       | 17.04    | 27.09    | 0.0001     | 107.05   | 3.66       | 0.25      | 7264.66  | 2368.86    |
| 1     | 0.34       | 1.55      | 0.55      | 0.28      | 0.99      | 0.0001    | 17.99     | 1.33       | 0.0001     | 0.36       | 0.0001     | 10.52    | 28.56    | 0.0001     | 202.08   | 13.65      | 1.77      | 8374.91  | 3624.71    |
| 1     | 0.13       | 0.0001    | 0.24      | 0.2       | 0.21      | 0.0001    | 1.97      | 1.89       | 0.0001     | 0.45       | 0.0001     | 8.11     | 26.83    | 0.0001     | 56.13    | 10.68      | 0.0001    | 1775.03  | 12723.9    |
| 1     | 0.29       | 0.0001    | 0.16      | 0.45      | 21.73     | 0.77      | 36.21     | 2.02       | 0.0001     | 11.57      | 0.0001     | 13.11    | 26.83    | 3.36       | 468.09   | 19.35      | 1.77      | 19967.49 | 7717.68    |
| 1     | 0.33       | 0.0001    | 0.14      | 0.49      | 5.53      | 0.58      | 30.05     | 1.82       | 0.0001     | 0.28       | 0.0001     | 7.13     | 22.87    | 0.0001     | 271.98   | 15.44      | 1.77      |          |            |
| 1     | 0.17       | 0.0001    | 0.38      | 0.41      | 2.05      | 0.0001    | 23.55     | 1.99       | 0.0001     | 10.88      | 0.0001     | 7.62     | 23.3     | 0.0001     | 143.2    | 13.68      | 0.88      |          |            |
| 1     | 0.29       | 1.45      | 0.21      | 0.28      | 2.51      | 1.03      | 10.54     | 1.42       | 0.0001     | 0.53       | 0.0001     | 23.36    | 25.62    | 0.0001     | 219.37   | 10.12      | 1.77      |          |            |
| 1     | 0.25       | 0.0001    | 0.26      | 0.12      | 1.52      | 0.9       | 12.47     | 2.55       | 0.0001     | 13.51      | 6.16       | 6.14     | 25.28    | 1.71       | 206.45   | 11.1       | 2.46      | 17245.56 | 8577.14    |
| 1     | 0.16       | 0.37      | 0.0001    | 0.3       | 1.25      | 0.96      | 10.99     | 1.45       | 0.0001     | 0.0001     | 0.0001     | 6.14     | 26.4     | 0.0001     | 133.54   | 7.13       |           | 38797.99 | 15838.38   |
| 1     | 0.23       | 0.0001    | 0.26      | 0.18      | 1.25      | 0.0001    | 7.98      | 0.03       | 0.0001     | 0.7        | 0.0001     | 4.62     | 21.32    | 0.0001     | 80.35    | 6.04       |           | 23052.16 | 5270.97    |
| 1     | 0.16       | 0.0001    | 0.16      | 0.37      | 0.0001    | 0.0001    | 4.15      | 0.8        | 0.0001     | 0.79       | 0.78       | 9.56     | 21.49    | 0.0001     | 73.83    | 4.67       | 0.66      | 1466.62  | 4264.76    |
| 1     | 0.42       | 2.78      | 0.16      | 0.24      | 0.66      | 0.0001    | 14.01     | 1.2        | 0.0001     | 0.01       | 0.0001     | 12.41    | 24.76    | 0.0001     | 96.58    | 5.3        | 0.0001    | 26556.57 | 14734.59   |
| 1     | 0.18       | 0.05      | 0.09      | 0.28      | 2.05      | 0.0001    | 12.47     | 1.03       | 0.0001     | 2.18       | 0.0001     | 8.11     | 26.66    | 0.0001     | 142.01   | 14.71      | 4.61      | 15232.12 | 2781.68    |
| 1     | 0.19       | 0.0001    | 0.41      | 0.62      | 4.05      | 0.38      | 16.7      | 1.54       | 0.0001     | 0.19       | 0.0001     | 2.53     | 23.81    | 1.71       | 297.33   | 18.84      | 1.32      | 5536.57  | 2152.43    |
| 1     | 0.29       | 0.0001    | 0.45      | 0.32      | 4.86      | 0.51      | 13.94     | 1.48       | 0.0001     | 0.06       | 0.0001     | 9.8      | 26.14    | 0.0001     | 369.37   | 7.76       | 1.32      | 18010.53 | 2368.86    |
| 1     | 0.17       | 0.0001    | 0.43      | 0.18      | 0.92      | 0.0001    | 29.92     | 1.15       | 0.0001     | 0.0001     | 0.0001     | 5.39     | 28.56    | 0.0001     | 140.97   | 10.19      | 2.23      | 23280.41 | 6527.92    |
| 1     | 0.18       | 0.0001    | 0.36      | 0.12      | 2.18      | 0.0001    | 10.99     | 1.63       | 0.0001     | 8.61       | 0.0001     | 9.32     | 22.52    | 7.75       | 80.62    | 8.52       | 0.88      | 17158.32 | 2368.86    |
| 1     | 0.22       | 0.0001    | 0.43      | 0.51      | 3.85      | 0.31      | 29.4      | 1.48       | 0.0001     | 0.0001     | 0.0001     | 3.59     | 18.5     | 4.89       | 499.66   | 9.13       | 1.32      | 10397.67 | 2368.86    |
| 1     | 0.18       | 0.08      | 0.21      | 0.49      | 2.25      | 0.11      | 17.86     | 1.57       | 0.0001     | 0.0001     | 0.0001     | 7.13     | 28.04    | 0.0001     | 225.37   | 5.81       | 3.4       |          |            |
| 1     | 0.48       | 0.25      | 0.31      | 0.49      | 4.86      | 0.0001    | 22.97     | 1.82       | 0.0001     | 2.5        | 0.0001     | 11.47    | 13.13    | 0.0001     | 438.07   | 15.28      | 1.77      | 10992.85 | 2781.68    |
| 1     | 0.04       | 2.02      | 0.41      | 0.2       |           | 0.77      | 5.3       | 1.95       | 0.0001     | 0.7        | 0.0001     | 2.53     | 35.16    | 0.0001     | 81.01    | 4.95       | 0.0001    | 3504.32  | 2578.25    |
| 1     | 0.25       | 0.0001    | 0.16      | 0.32      | 4.05      | 0.0001    | 22.25     | 1.89       | 0.0001     | 0.19       | 0.0001     | 10.52    | 24.24    | 0.0001     | 367.65   | 12.13      | 2.93      | 22840.11 | 3732.6     |
| 1     | 0.34       | 0.0001    | 0.24      | 0.53      | 4.05      | 0.31      | 20.19     | 0.8        | 0.0001     | 4.01       | 8.07       | 7.13     | 19.1     | 0.0001     | 262.07   | 18         | 1.32      | 13245.73 | 6830.78    |
| 1     | 0.45       | 0.0001    | 0.24      | 0.7       | 3.85      | 1.09      | 37.26     | 1.99       | 0.5        | 5.58       | 0.0001     | 20.67    | 20.64    | 1.71       | 436.33   | 12.09      | 2.23      | 24760.13 | 9961.24    |
| 1     | 0.29       | 0.0001    | 0.55      | 0.28      | 2.18      | 1.15      | 23.03     | 1.51       | 0.0001     | 2.9        | 0.0001     | 9.08     | 23.21    | 12.42      | 230.54   | 15.77      | 4.12      | 15180.55 | 2368.86    |
| 1     | 0.95       | 0.0001    | 0.21      | 0.66      | 3.11      | 1.92      | 67.84     | 1.51       | 0.0001     | 54.76      | 0.0001     | 10.99    | 39.88    | 0.0001     | 186.78   | 24.99      | 2.23      |          |            |
| 1     | 0.42       | 0.0001    | 0.31      | 0.62      | 2.05      | 0.77      | 23.42     | 1.54       | 0.78       | 0.32       | 3.41       | 35.59    |          | 7.75       | 150.34   | 29.62      | 8.59      | 24313.67 | 8006.94    |
| 1     | 0.27       | 0.0001    | 0.45      | 0.28      | 3.38      | 0.9       | 10.48     | 1.57       | 1.31       | 20.71      | 0.0001     | 138.78   | 21.84    | 0.0001     | 158.39   | 2.72       | 0.88      | 10682.71 | 3173.72    |
| 1     | 0.18       | 0.0001    | 0.71      | 0.78      | 112.57    | 0.31      | 85.03     | 2.48       | 0.0001     | 0.62       | 0.0001     | 15.2     | 10.76    | 10.46      | 717.69   | 17.36      | 2.46      | 12126.84 | 3173.72    |
| 1     | 0.53       | 0.0001    | 0.45      | 0.41      | 3.98      | 1.09      | 47        | 1.51       | 0.0001     | 13.06      | 0.0001     | 10.04    | 6.89     | 0.0001     | 368.92   | 14.05      | 2.93      |          |            |
| 1     | 0.45       | 0.0001    | 0.06      | 0.53      | 1.52      | 4.29      | 13.56     | 2.68       | 0.0001     | 19.35      | 0.0001     | 1.99     | 12.8     | 0.0001     | 216.84   | 11.72      | 7.08      | 27941.38 | 12080.58   |
| 1     | 0.3        | 0.99      | 0.6       | 0.57      | 6.21      | 0.9       | 29.14     | 1.95       | 0.08       | 1.37       | 0.0001     | 28.22    | 24.59    | 1.71       | 270.85   | 8.16       | 1.1       | 13419.88 | 7129.84    |
| 1     | 0.23       | 0.0001    | 0.26      | 0.32      | 8.94      | 0.25      | 22.77     | 2.08       | 0.0001     | 1.49       | 0.0001     | 13.81    | 21.66    | 1.71       | 182.42   | 8.38       | 0.45      | 15477.77 | 4607.76    |
| 1     | 0.37       | 0.0001    | 0.41      | 0.37      | 10.31     | 0.25      | 22.25     | 1.33       | 0.0001     | 0.19       | 0.0001     | 10.04    | 26.92    | 0.0001     | 331.76   | 7.9        | 3.4       | 21118.93 | 13106.21   |
| 1     | 0.5        | 0.0001    | 0.31      | 0.28      | 1.98      | 0.05      | 6.07      | 0.8        | 0.0001     | 1.69       | 0.0001     | 16.12    | 17.64    | 6.34       | 250.11   | 8.77       | 3.64      | 20367.31 | 4607.76    |
| 1     | 0.23       | 0.0001    | 0.11      | 0.57      | 2.18      | 0.38      | 13.62     | 1.48       | 0.0001     | 0.15       | 1.32       | 7.13     | 21.32    | 0.0001     |          | 11.48      | 0.66      | 8906.73  | 3549.65    |
| 1     | 0.27       | 0.0001    | 0.21      | 0.41      | 1.38      | 0.38      | 12.34     | 1.23       | 0.0001     | 0.45       | 0.0001     | 10.52    | 20.89    | 0.0001     | 180.45   | 7.72       | 1.32      | 8280.01  | 4607.76    |
| 1     | 0.22       | 0.0001    | 0.21      | 0.24      | 5.13      | 0.7       | 13.3      | 1.09       | 0.08       | 1.04       | 0.0001     | 20.22    | 16.96    | 0.0001     | 268.81   | 13.04      | 1.32      | 22164.93 | 5107.72    |
| 1     | 0.29       | 0.0001    | 0.67      | 0.85      | 2.51      | 1.15      | 59.28     | 2.08       | 0.64       |            | 0.0001     | 23.36    | 3.21     | 0.0001     | 255.67   | 9.34       | 3.88      | 35252.23 | 13611.95   |
| 1     | 0.23       | 0.0001    | 0.41      | 0.22      | 0.0001    | 0.25      | 17.35     | 2.89       | 0.0001     | 1.2        | 0.0001     | 16.12    | 17.39    | 0.0001     | 149.41   | 1.91       | 1.54      | 24010.6  | 34379.47   |
| 1     | 0.39       | 0.0001    | 0.69      | 0.2       | 2.31      | 0.38      | 34.7      | 1.76       | 0.0001     | 95.53      | 0.0001     | 19.09    | 20.12    | 0.0001     | 251.84   | 17.49      | 0.45      | 30675.97 | 14113.4    |
| 1     | 0.34       | 0.0001    | 0.11      | 0.41      | 2.85      | 0.77      | 18.12     | 2.05       | 0.0001     | 0.06       | 0.0001     | 12.17    | 33.59    | 7.75       | 166.08   | 12.6       | 1.32      | 8280.01  | 3549.65    |
| 1     | 0.39       | 0.0001    | 0.24      | 0.57      | 0.14      | 0.31      | 21.22     | 1.18       | 0.0001     | 61.74      | 0.0001     | 34.09    | 9.92     | 10.46      | 314.72   | 11.44      | 5.83      | 20785.01 | 7862.67    |
| 1     | 0.18       | 0.0001    | 0.74      | 0.24      | 1.06      | 2.42      | 21.54     | 1.45       | 0.0001     | 0.7        | 0.0001     | 29.97    | 29.77    | 0.0001     | 176.62   | 9.13       | 2.23      | 14084.27 | 7129.84    |
| 1     | 0.45       | 0.01      | 0.55      | 0.45      | 0.73      | 0.25      | 23.29     | 1.89       | 0.0001     | 0.87       | 0.0001     | 17.27    | 20.46    | 4.89       | 215.08   | 10.82      | 2.23      | 10113.76 | 3549.65    |
| 1     | 0.31       | 0.0001    | 0.33      | 0.62      | 0.47      | 0.9       | 24.07     | 1.6        | 0.5        | 18.6       | 0.0001     | 15.66    | 32.55    | 69.71      | 313.43   | 7.5        | 3.64      | 20611.72 | 2781.68    |
| 1     | 0.21       | 0.0001    | 0.55      | 0.37      | 1.91      | 1.41      | 18.77     | 3.17       | 0.0001     | 3.82       | 0.0001     | 27.34    | 23.21    | 10.46      | 294.74   | 13.68      | 5.59      | 25481.75 | 8006.94    |
| 1     | 0.31       | 0.0001    | 0.33      |           | 2.31      | 1.03      | 18.64     | 1.06       | 0.0001     | 2.26       | 0.0001     | 15.66    | 23.21    | 1.71       | 227.71   | 10.16      | 2.69      | 16844.23 | 5270.97    |
| 1     | 0.23       | 2.33      | 0.16      | 0.37      | 3.85      | 0.0001    | 22.97     | 1.63       | 0.0001     | 40.07      | 0.0001     | 18.18    | 18.5     | 0.0001     | 230.66   | 18.26      | 2         | 40910.28 | 6374.97    |
| 1     | 0.53       | 0.43      | 0.24      | 0.74      | 4.93      | 1.41      | 28.68     | 1.57       | 0.0001     | 68.67      | 0.0001     | 11.94    | 15       | 4.89       | 312.22   | 14.65      | 8.85      | 21897.54 | 3912.6     |
| 1     | 0.43       | 0.61      | 0.45      | 0.37      | 1.65      | 1.79      | 12.79     | 1.95       | 0.0001     | 8.34       | 0.0001     | 39.02    | 22.09    | 0.0001     | 241.43   | 8.63       | 4.61      | 15103.31 | 7129.84    |
| 1     | 0.31       | 1.72      | 0.38      | 0.41      | 4.99      | 0.9       | 28.55     | 1.45       | 0.08       | 4.96       | 0.0001     | 16.58    | 21.58    | 2.56       | 143.05   | 22.33      | 3.4       | 20152.7  | 14610.83   |
| 1     | 0.31       | 0.0001    | 0.6       | 0.87      | 3.11      | 1.03      | 20.9      | 2.05       | 0.23       | 1.77       | 19.95      | 15.66    | 19.1     | 0.0001     | 231.84   | 10.3       | 5.59      | 23242.29 | 5107.72    |
| 1     | 0.37       | 0.0001    | 0.92      | 0.64      | 1.38      | 1.54      | 13.49     | 1.7        | 0.0001     | 3.62       | 0.0001     | 64.45    | 20.81    | 6.34       | 172.86   | 19.66      | 2.69      | 24329.26 | 1927.54    |
| 1     | 0.37       | 0.0001    | 0.5       | 0.45      | 4.25      | 0.11      | 23.68     | 2.02       | 0.0001     | 1.08       | 0.0001     | 14.74    | 17.56    | 10.46      | 282.12   | 6.64       | 1.32      | 18690.87 | 4607.76    |
| 1     | 1.36       | 1.16      | 0.42      | 0.38      | 5.55      | 5.57      | 42.44     | 5.76       | 2.05       | 72.94      | 28.76      | 59.99    | 85.77    | 33.54      | 372.3    | 20.01      | 17        | 12650.94 | 21834.67   |
| 1     | 0.15       | 0.0001    | 0.35      | 0.4       | 8.57      | 11.58     | 88.21     | 7.8        | 0.56       | 106.08     | 3.42       | 177.33   | 97.47    | 12.62      | 417.09   | 27.73      | 8.49      | 11608.56 | 18192.46   |
| 1     | 0.49       | 0.21      | 0.15      | 0.26      | 0.89      | 0.08      | 1.93      | 6.68       | 0.92       | 8.87       | 16.52      | 11.06    | 89.64    | 7.03       | 142.15   | 6.65       | 4.05      | 894.76   | 1181.1     |
| 1     | 0.69       | 0.0001    | 0.15      | 0.21      | 8.8       | 1.25      | 4.6       | 4.28       | 0.56       | 1.66       | 16.14      | 23.15    | 48.3     | 0.0001     | 110.38   | 5.62       | 2.45      | 4195.84  | 3229.01    |
| 1     | 0.12       | 0.0001    | 0.15      | 0.21      | 0.89      | 5.67      | 3.88      | 4.32       | 0.33       | 27.86      | 1.61       | 1.96     | 65.12    | 3.85       | 201.61   | 6.38       | 2.45      | 1764.47  | 2170.47    |
| 1     | 0.07       | 0.0001    | 0.03      | 0.21      | 9.49      | 4.49      | 12.51     | 5.38       | 0.1        | 2.03       | 1.43       | 19.15    | 64.57    | 0.0001     | 119.05   | 7.33       | 2.09      | 4479.52  | 3080.08    |

|   |       |          |          |         |          |          |         |          |          |          |        |          |        |          |          |          |        |         |         |
|---|-------|----------|----------|---------|----------|----------|---------|----------|----------|----------|--------|----------|--------|----------|----------|----------|--------|---------|---------|
| 1 | 0.15  | 0.0001   | 0.0001   | 0.5     | 5.49     | 0.08     | 11.95   | 5.22     | 0.38     | 0.03     | 0.18   | 19.15    | 52.75  | 0.0001   | 305.48   | 13.54    | 2.8    | 6566.9  | 5517.93 |
| 1 | 0.34  | 0.0001   | 0.59     | 0.67    | 9.39     | 4.55     | 12.23   | 4.97     | 1.54     | 22.95    | 11.32  | 45.47    | 47.74  | 31.4     | 294.6    | 7.77     | 4.94   | 6314.33 | 2485.59 |
| 1 | 0.21  | 0.0001   | 0.38     | 0.65    | 3.61     | 13.93    | 13.14   | 5.11     | 1.29     | 59.88    | 3.96   | 67.17    | 53.3   | 17.69    | 459.57   | 14.41    | 4.94   | 7855.56 | 6925.1  |
| 1 | 0.42  | 0.0001   | 0.29     | 0.3     | 8.6      | 4.36     | 13.63   | 3.15     | 0.8      | 33.96    | 12.99  | 48.52    | 33.31  | 15.2     | 428.12   | 7.77     | 6.71   | 5937    | 4369.03 |
| 1 | 0.33  | 0.0001   | 0.22     | 0.08    | 1.62     | 10.79    | 9.14    | 4.97     | 0.68     | 8.38     | 12.71  | 34.47    | 53.72  | 11.29    | 48.82    | 13.45    | 3.52   | 4626.4  | 1134.92 |
| 1 | 0.47  | 0.0001   | 0.15     | 0.13    | 2.34     | 3.96     | 4.6     | 2.49     | 0.33     | 17.63    | 14.47  | 45.86    | 34.6   | 0.0001   | 233.62   | 6.17     | 7.78   | 4494.52 | 4425.32 |
| 1 | 0.09  | 0.0001   | 0.19     | 0.42    | 3.55     | 1.25     | 17.85   | 4.39     | 0.38     | 0.16     | 0.71   | 41.22    | 53.58  | 0.0001   | 289.82   | 14.62    | 2.63   | 7546.74 | 8891.45 |
| 1 | 0.07  | 0.0001   | 0.03     | 0.52    | 1.43     | 14.8     | 10.26   | 4.23     | 0.33     | 15.8     | 1.07   | 136.11   | 57.72  | 0.0001   | 277.32   | 7.58     | 2.63   | 4505.04 | 5830.37 |
| 1 | 0.12  | 0.0001   | 0.05     | 0.52    | 4.09     | 11.23    | 15.18   | 4.74     | 0.33     | 18.98    | 0.89   | 79.38    | 43.26  | 0.0001   | 337.52   | 18.62    | 2.63   | 7573.91 | 3835.37 |
| 1 | 0.47  | 0.0001   | 0.32     | 0.5     | 3.17     | 3.63     | 12.3    | 4.48     | 1.29     | 7.06     | 13.17  | 47       | 48.58  | 17.69    | 236.16   | 8.2      | 4.58   | 6289.34 | 3601.89 |
| 1 | 1.27  | 0.0001   | 0.83     | 0.73    | 3.67     | 4.32     | 9.56    | 1.93     | 4.13     | 10.29    | 26.23  | 40.83    | 60.74  | 64.93    | 237.67   | 9.73     | 16.47  | 3571.69 | 1504.44 |
| 1 | 0.12  | 0.0001   | 0.22     | 0.54    | 3.29     | 7.41     | 15.32   | 5.8      | 0.68     | 11.66    | 1.79   | 151.71   | 74.62  | 3.85     | 314.7    | 17.46    | 3.87   | 6691.36 | 4359.65 |
| 1 | 0.5   | 0.0001   | 0.11     | 0.21    | 1.3      | 0.82     | 3.09    | 2.14     | 0.56     | 0.03     | 15.77  | 15.92    | 34.74  | 2.03     | 309.1    | 6.17     | 2.09   | 3579.64 | 1264.23 |
| 1 | 0.47  | 0.0001   | 0.07     | 0.21    | 2.03     | 0.6      | 6.03    | 1.05     | 0.33     | 0.0001   | 12.99  | 19.6     | 27.38  | 0.0001   | 192.32   | 4.96     | 2.09   | 2791.76 | 1024.09 |
| 1 | 0.1   | 0.0001   | 0.07     | 0.26    | 2.8      | 39.49    | 17      | 4.87     | 0.8      | 25.53    | 1.97   | 311.11   | 69.2   | 3.85     | 359.61   | 17.11    | 2.8    | 2424.68 | 1781.78 |
| 1 | 0.1   | 0.0001   | 0.03     | 0.48    | 2.29     | 42.21    | 14.13   | 4.19     | 0.38     | 18.44    | 0.54   | 119.84   | 49.41  | 0.0001   | 284.27   | 11.88    | 2.45   | 5305.85 | 5555.76 |
| 0 | 0.33  | 0.25     | 0.55     | 0.41    | 4.32     | 1.03     | 22.64   | 1.95     | 0.0001   | 4.72     | 0.0001 | 100.91   | 18.92  | 7.05     | 313.04   | 11.17    | 9.87   | 6972.73 | 2490.31 |
| 0 | 4.07  | 0.0001   | 0.24     | 0.32    | 0.86     | 0.0001   | 33.06   | 1.63     | 0.0001   | 4.41     | 0.0001 | 23.36    | 18.24  | 0.0001   | 69.79    | 3.15     | 2.93   | 1331.99 | 592.21  |
| 0 | 4.96  | 0.0001   | 0.0001   | 0.0001  | 1.22     | 0.36     | 35.92   | 0.34     | 0.0001   | 0.0001   | 0.0001 | 14.77    | 13.99  | 0.0001   | 63.69    | 2.61     | 0.68   | 6474.28 | 4182.45 |
| 0 | 4.43  | 0.0001   | 0.0001   | 0.0001  | 1.57     | 1.48     | 39.48   | 0.01     | 0.0001   | 0.42     | 0.0001 | 3.16     | 7.95   | 8.93     | 75.78    | 3.02     | 0.0001 | 1578.39 | 770.01  |
| 0 | 0.3   | 0.0001   | 0.73     | 0.65    | 1.73     | 2.45     | 12.37   | 5.29     | 1.79     | 4.05     | 9.84   | 17.78    | 53.72  | 45.86    | 143.82   | 5.74     | 6.71   | 3844.1  | 3732.59 |
| 0 | 0.54  | 0.0001   | 0.31     | 0.34    | 1.41     | 3.79     | 7.3     | 2.95     | 0.92     | 29.24    | 12.89  | 10.04    | 42.41  | 17.69    | 205.24   | 4.48     | 5.29   | 3290.98 | 4415.94 |
| 0 | 0.24  | 0.0001   | 0.19     | 0.26    | 1.09     | 2.04     | 9.56    | 4.97     | 0.56     | 1.18     | 9.47   | 7.93     | 38.45  | 7.03     | 185.61   | 4.62     | 3.52   | 3288.43 | 2875.51 |
| 0 | 0.15  | 0.0001   | 0.15     | 0.3     | 1.38     | 16.13    | 12.09   | 5.01     | 0.44     | 34.04    | 0.71   | 14.01    | 40.43  | 3.85     | 235.9    | 4.69     | 2.98   | 3039.92 | 3173.14 |
| 0 | 0.09  | 0.0001   | 0.03     | 0.3     | 1.62     | 7.8      | 9.56    | 4.69     | 0.21     | 5.38     | 0.89   | 9        | 53.58  | 0.0001   | 218.07   | 5.55     | 2.45   | 3290.98 | 4331.52 |
| 0 | 0.09  | 0.0001   | 0.11     | 0.3     | 3.67     | 7.03     | 3.74    | 6.3      | 0.21     | 0.99     | 1.97   | 11.06    | 78.53  | 0.0001   | 251.52   | 3.82     | 3.16   | 2868.8  | 1171.87 |
| 0 | 0.12  | 0.0001   | 0.11     | 0.34    | 3.2      | 2.69     | 154.59  | 9.49     | 0.56     | 30.51    | 1.61   | 7.93     | 65.12  | 3.85     | 83.48    | 9.71     | 2.8    | 5324.36 | 6657.69 |
| 0 | 0.1   | 0.0001   | 0.03     | 0.42    | 3.26     | 2.28     | 158.44  | 11.51    | 0.8      | 27.22    | 2.15   | 9        | 62.52  | 3.85     | 85.43    | 10.88    | 3.16   | 6001.35 | 6638.61 |
| 0 | 1.285 | 0.020925 | 0.204183 | 0.30335 | 2.110833 | 3.923342 | 41.5625 | 4.511667 | 0.457533 | 11.84668 | 3.2942 | 19.07917 | 41.155 | 8.175867 | 160.9475 | 5.786667 | 0.0001 |         |         |
